# Supplementary material for: A Critical Review on the Role of Food and Nutrition in the Energy Balance
Source: PubMed Central journal article supplement (PMC7231187; doi:10.3390/nu12041161), 2020-04-22
Supplement: nutrients-12-01161-s001.pdf [file nutrients-12-01161-s001.pdf]

**TableS1. Effects on energy expenditure and hypothesized mechanisms to induce weight loss**

| Food                                                                                                                                                  | Main active compound(s)                                             | Effect(s) on EE                                                                                                                                                          | Mechanisms of action                                                                                                                                                                                                                                                                                              | References                                                                                 |
|-------------------------------------------------------------------------------------------------------------------------------------------------------|---------------------------------------------------------------------|--------------------------------------------------------------------------------------------------------------------------------------------------------------------------|-------------------------------------------------------------------------------------------------------------------------------------------------------------------------------------------------------------------------------------------------------------------------------------------------------------------|--------------------------------------------------------------------------------------------|
| <b>Green coffee</b><br><i>(Coffea canephora, Coffea Arabica)</i><br> | Caffeine, chlorogenic acid                                          | Enhanced thermogenesis<br>Increased REE<br>Browning of WAT<br>Increased fatty acids oxidation                                                                            | Up-regulation of UCP1 and BAT-selective regulatory genes<br>Activation of cAMP<br>$\beta$ 2- and $\beta$ 3-adrenergic receptors stimulation<br>Up-regulation of AMPK<br>Antagonism of TRPV-4                                                                                                                      | [55]****<br>[57]**<br>[58]****<br>[59]* [60]<br>[61]**** [63]*<br>[62]* [64]**             |
| <b>Green Tea</b><br><i>(Camellia sinensis)</i><br>                   | Catechins, caffeine                                                 | Enhanced thermogenesis<br>Increased EE<br>Increased fat oxidation                                                                                                        | Inhibition of phosphodiesterase enzymes<br>Up-regulation of the gene expressions of UCPs<br>Inhibition of norepinephrine degradation with increased SNS activity<br>Stimulation of substrates in Cori cycle and free fatty acid-triglyceride cycle<br>Activation of AMPK<br>Increased glycolysis and ATP turnover | [68]* [69]*<br>[70] [71]*<br>[72]* [73]**<br>[74]**/****<br>[75]*** [76]*                  |
| <b>Cocoa and dark chocolate</b><br>                                 | Caffeine, theobromine, polyphenols                                  | Increased thermogenesis in liver and in WAT<br>Increased mitochondrial biogenesis<br>Fatty acid oxidation                                                                | Increased expression of thermogenic genes and release of free-fatty acids<br>Induced expression of UCPs, PGC-1 $\alpha$ and AMPK $\alpha$<br>Adenosine receptor blockage<br>Stimulation of basal and noradrenaline-induced lipolysis<br>Activation of AMPK                                                        | [79]** [80]*<br>[81] [82]****<br>[83] [84]*<br>[85]* [86] [87]<br>[88] [90]* [91]<br>[92]* |
| <b>Yerba Mate</b><br><i>(Ilex Paraguariensis)</i><br>              | Polyphenols, alkaloids, triterpenoids, flavonoids, chlorogenic acid | Increased REE<br>Increased fatty acids oxidation<br>Inhibition of adipogenesis<br>Increased AEE<br>Enhanced thermogenesis in WAT<br>Reduced fatty acids synthesis in WAT | Up-regulation of AMPK,<br>Down-regulation of genes <i>Creb-1</i> and <i>C/EBP<math>\alpha</math></i><br><br>Preferential use of fatty acids as energy substrate<br>Activation of mitochondrial genesis<br>expression of UCPs                                                                                      | [63]* [95]*<br>[96] [97]**<br>[98]** [99]<br>[100] [101]                                   |

|                                                                                                                                             |                                                                                                                                                   |                                                                                                                                                                                                       |                                                                                                                                                                                                                                                                                                            |                                                                                       |
|---------------------------------------------------------------------------------------------------------------------------------------------|---------------------------------------------------------------------------------------------------------------------------------------------------|-------------------------------------------------------------------------------------------------------------------------------------------------------------------------------------------------------|------------------------------------------------------------------------------------------------------------------------------------------------------------------------------------------------------------------------------------------------------------------------------------------------------------|---------------------------------------------------------------------------------------|
| <p><b>Bitter Orange</b><br/>(<i>Citrus Aurantium</i>)</p>  | <p>Alkaloids<br/>(synephrine,<br/>octopamine)</p> <p>Flavonoids<br/>(hesperidin,<br/>naringin, limonene,<br/>tangaretin)</p>                      | <p>Enhanced thermogenesis in<br/>WAT<br/>reduced fatty acids synthesis<br/>in WAT</p> <p>Increased REE and DIT<br/>Increased mitochondrial<br/>biogenesis</p>                                         | <p>Enhanced expression of UCPs</p>                                                                                                                                                                                                                                                                         | <p>[104]* [105]*<br/>[106]* [107]**<br/>[108]** [109]*<br/>[111] [112]</p>            |
| <p><b>Ginger</b><br/>(<i>Zingiber officinale</i>)</p>      | <p>Zingerone</p>                                                                                                                                  | <p>Enhanced thermogenesis</p> <p>Increased DIT<br/>Enhanced BAT function<br/>Activated WAT browning<br/>Increased mitochondrial<br/>biogenesis<br/>Increased fatty acid<br/>catabolism</p>            | <p>Activation of AMPK signaling in WAT<br/>Activation of TRPV1 channels (adrenaline releasing)<br/>Activation of the sirtuin-1 (SIRT1)/AMPK/ PGC-1<math>\alpha</math> pathways<br/>Transcriptional regulation of energy metabolizing proteins</p> <p>Activation of the PPAR<math>\delta</math> pathway</p> | <p>[117] [118]<br/>[119] [120]<br/>[121] [122]</p>                                    |
| <p><b>Turmeric,</b><br/>(<i>Curcuma longa</i>)</p>         | <p>Curcumin,<br/>turmerone</p>                                                                                                                    | <p>Enhanced thermogenesis<br/>Enhanced lipolysis</p>                                                                                                                                                  | <p>Activation of AMPK with increased UCP1 expression<br/>Increased mitochondrial biogenesis<br/>Increased expression of <math>\beta</math>3- adrenoceptors (and norepinephrine plasma levels)<br/>Upregulation of the cAMP/PKA/CREB pathway</p>                                                            | <p>[129] [130]<br/>[132]</p>                                                          |
| <p><b>Cinnamon</b></p>                                    | <p>Cinnamaldehyde</p>                                                                                                                             | <p>Enhanced thermogenesis</p>                                                                                                                                                                         | <p>Increased expression of UCP1 in BAT<br/>Activation of phospho-AMPK<br/>Regulation of cAMP dependent protein kinase/p38 MAPK-dependent pathway<br/>Activation of the TRPA1 (adrenalin secretion)</p>                                                                                                     | <p>[136] [137]**<br/>[138]** [140]<br/>[142] [143]<br/>[144] [145]</p>                |
| <p><b>Chilli pepper</b> (<i>Capsicum species</i>)</p>    | <p>Capsaicinoids<br/>(capsaicin and<br/>dihydro-capsaicin),<br/>capsinoids<br/>(capsiate,<br/>dihydro-capsiate,<br/>nordihydro-<br/>capsiate)</p> | <p>Enhanced thermogenesis<br/>enhanced EE<br/>Activation and recruitment of<br/>BAT<br/>Increased EE<br/>decrease RQ<br/>reduction of the decrease in<br/>DIT and REE during<br/>hypocaloric diet</p> | <p>Up-regulation of the expression of SIRT1 and PGC-1<math>\alpha</math> with increased expression of UCP1 and bone morphogenetic protein 8b<br/>Stimulation of the SNS and the catecholamine secretion from adrenal gland<br/>Activation of TRPV1 and stimulation of the SNS</p>                          | <p>[19]* [137]**<br/>[151]* [152]*<br/>[153]* [154]*<br/>[155]** [156]<br/>[157]*</p> |

|                                                                                                                                                   |                                                                    |                                                                                                         |                                                                                                                                                                            |                                                                        |
|---------------------------------------------------------------------------------------------------------------------------------------------------|--------------------------------------------------------------------|---------------------------------------------------------------------------------------------------------|----------------------------------------------------------------------------------------------------------------------------------------------------------------------------|------------------------------------------------------------------------|
| <b>Garcinia Cambogia</b><br>                                     | Hydroxy-citric acid, anthones, benzophenones                       | Increased BEE<br>increased fat oxidation<br>decreased <i>de novo</i> lipogenesis                        | Activation of the adiponectin-AMPK signalling pathway<br>Regulation of thyroid hormone levels<br>Down-regulation of ATP-citrate lyase                                      | [159]* [160]*<br>[161]* [162]**<br>[163]***<br>[164]*** [166]<br>[167] |
| <b>Guarana (<i>Paullinia cupana</i>)</b><br>                     | Caffeine, polyphenols, theobromine, theophylline                   | Increased thermogenesis<br>Increased BEE<br>Inhibited adipogenesis                                      | Induced BAT expansion<br>Increased mitochondrial biogenesis<br>Enhanced UCP1 expression<br>AMPK activation                                                                 | [176]**<br>[177]*** [178]<br>[179]                                     |
| <b>Brassicaceae (or Cruciferae)</b><br>                          | Glucoraphanin (hydrolyzed to the biologically active sulforaphane) | Enhanced thermogenesis<br>increased mitochondrial biogenesis function<br>enhanced EE<br>browning of WAT | Up-regulation of the Nrf2/SIRT1/PGC-1 $\alpha$ signalling<br>Enhanced UCP1 expression in beige adipocytes                                                                  | [182] [183]<br>[185] [186]<br>[187] [188]                              |
| <b>Nuts</b><br>                                                  | Flavonoids, MUFA, PUFA, Vitamins                                   | Increased DIT<br>Increased BEE                                                                          |                                                                                                                                                                            | [24]* [51]**<br>[192]*<br>[193]***<br>[194]**                          |
| <b>Apple cider vinegar</b><br>                                   | Acetic acid                                                        | Enhanced thermogenesis and fatty acids oxidation                                                        | Regulation of $\alpha$ 2-AMPK/PPAR $\alpha$ -mediated pathway with up-regulation of the expression of genes acetyl-CoA oxidase, carnitine palmitoyl transferase-1 and UCP2 | [198]                                                                  |
| <b>Spirulina (<i>Arthrospira platensis and maxima</i>)</b><br> |                                                                    | No data on EE                                                                                           |                                                                                                                                                                            |                                                                        |

\*Review including trials on humans with acute and/or chronic administration of product(s)

\*\* Trial on humans after acute administration of product(s)

\*\*\* Trial on humans after chronic administration of product(s)

\*\*\*\* Observational study on humans after acute administration of product(s)

Abbreviations: AEE: activity-induced energy expenditure, AMPK: adenosine monophosphate activated protein kinase, ATP: adenosine triphosphate, BAT: brown adipose tissue, BEE: basal energy expenditure, cAMP: cyclic adenosine monophosphate, CREB: cAMP response element-binding protein, DIT: diet-induced thermogenesis, EE: energy expenditure, MAPK: mitogen-activated protein kinase, MUFA: monounsaturated fatty acids, Nrf2: nuclear factor erythroid 2-related factor 2, PGC-1 $\alpha$ : PPAR $\gamma$  coactivator-1  $\alpha$ , PPAR: proliferator-activated receptor, PKA: protein kinase A, PUFA: polyunsaturated fatty acids, REE: resting energy expenditure, RQ: respiratory quotient, SIRT1: sirtuin 1, SNS: sympathetic nervous system, TRPA1: Transient Receptor Potential Ankyrin 1, TRPV: transient receptor potential vanilloid, UCP: uncoupling protein, WAT: white adipose tissue.
